# Supplementary material for: Improving performance of mesoporous MOF AlTp impregnated with ionic liquids for CO2 adsorption
Source: PubMed Central journal article supplement (PMC9958030; doi:10.1038/s41598-023-30267-x), 2023-02-24
Supplement: 41598_2023_30267_MOESM1_ESM.pdf [file 41598_2023_30267_MOESM1_ESM.pdf]

## **Supporting Information**

# **Improving performance of mesoporous MOF AlTp impregnated with ionic liquids for CO<sub>2</sub> adsorption**

Narmin Noorani, Abbas Mehrdad\*

Department of Physical Chemistry, Faculty of Chemistry, University of Tabriz, Tabriz, Iran

Corresponding Author, E-mail address: [a\\_mehrdad@tabrizu.ac.ir](mailto:a_mehrdad@tabrizu.ac.ir)

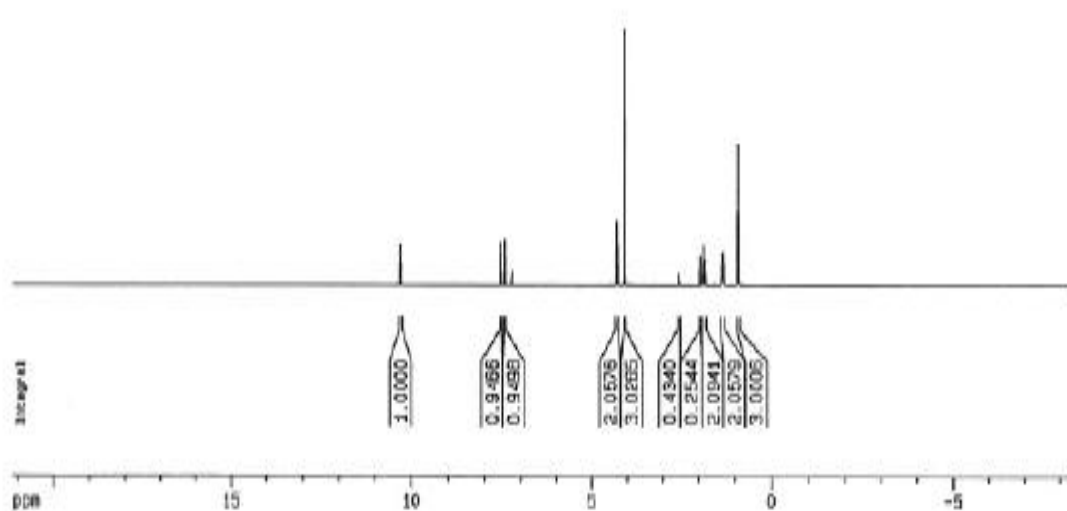

Figure S1. <sup>1</sup>H NMR data of 1-butyl-3-methyl imidazolium bromide: <sup>1</sup>H NMR (400 MHz; CDCl<sub>3</sub>; δ/ppm relative to TMS): 0.91 (3H, t, but-CH<sub>3</sub>), 1.34 (2H, m, CH<sub>2</sub>), 1.86 (2H, m, CH<sub>2</sub>), 4.08 (3H, s, NCH<sub>3</sub>), 4.29 (2H, t, NCH<sub>2</sub>), 7.46 (1H, s, NCH), 7.58 (1H, s, NCH), 10.30 (1H, s, NCHN).

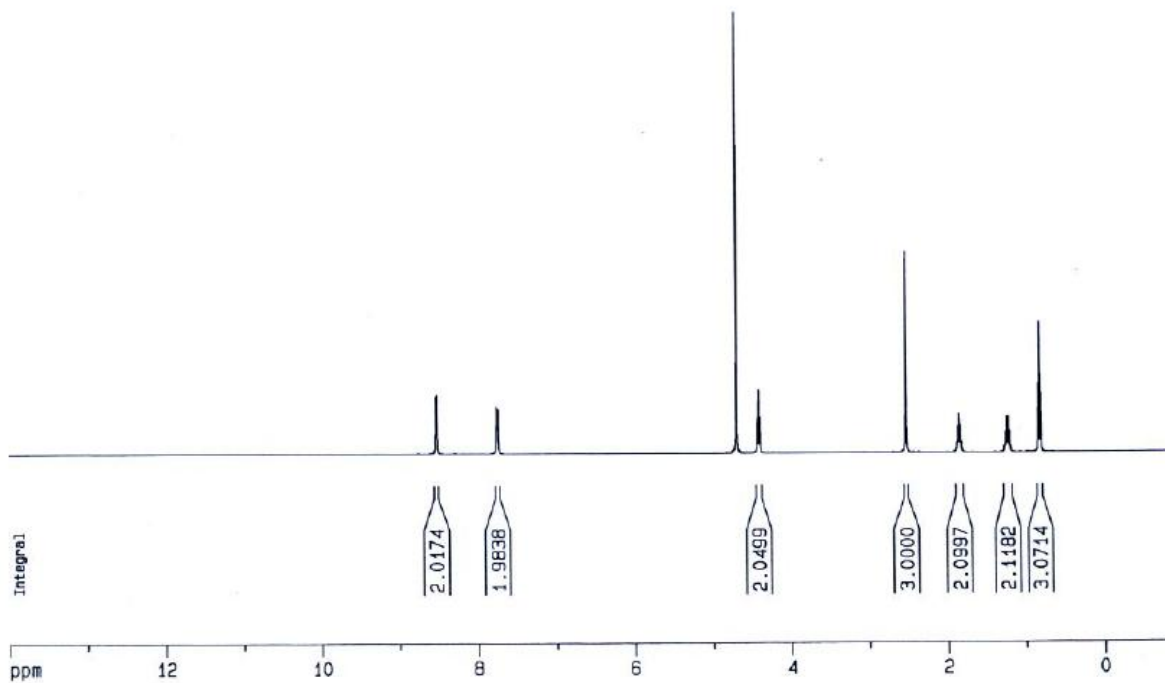

Figure S2.  $^1\text{H-NMR}$  data of 1-butyl-4-methylpyridinium bromide:  $^1\text{H-NMR}$  (400MHz:  $\text{D}_2\text{O}$ ;  $\delta/\text{ppm}$  relative to TMS): 0.81 (3H, but- $\text{CH}_3$ ), 1.24 (2H,  $\text{CH}_2$ ), 1.85 (2H,  $\text{CH}_2$ ), 2.53 (3H, C- $\text{CH}_3$ ), 4.42 (2H, N- $\text{CH}_2$ ), 7.75(2H, CH), 8.53 (2H, N-CH).

Additionally, the spectrum shows a signal at 4.7 ppm ( $\text{D}_2\text{O}$ , HDO).

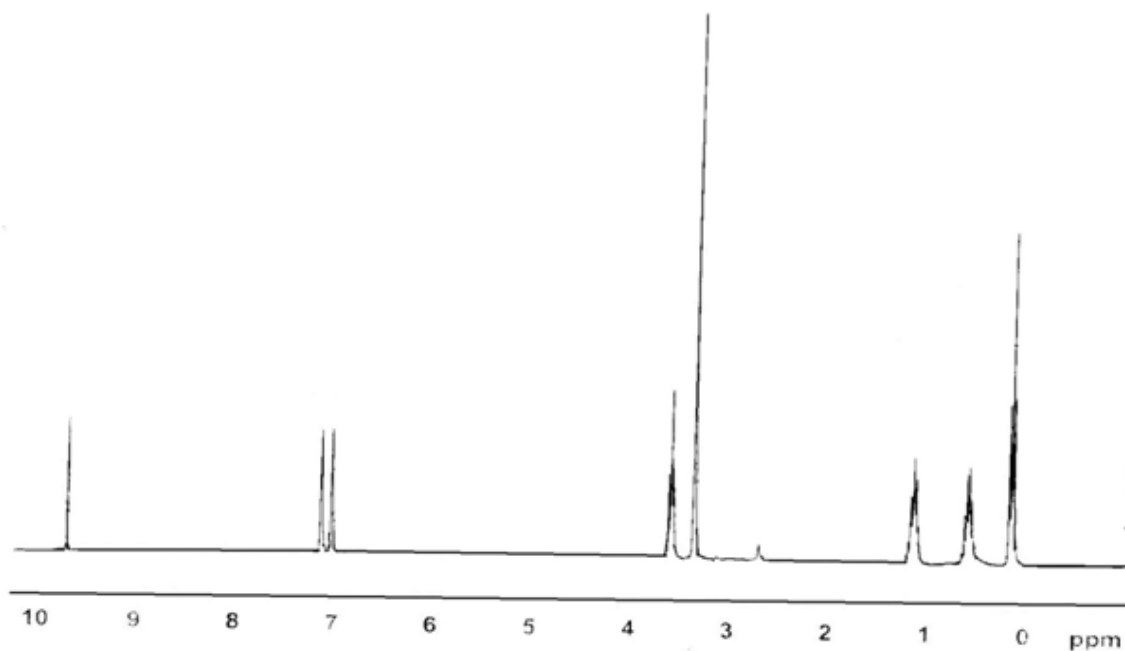

Figure S3.  $^1\text{H}$ NMR data of 1-butyl-3-methyl imidazolium chloride:  $^1\text{H}$ NMR (400MHz:  $\text{CDCl}_3$ ;  $\delta/\text{ppm}$  relative to TMS): 0.16 (3H, t, but- $\text{CH}_3$ ), 0.71 (2H, m,  $\text{CH}_2$ ), 1.13 (2H, m,  $\text{CH}_2$ ), 3.36 (3H, s,  $\text{NCH}_3$ ), 3.59 (2H, t,  $\text{NCH}_2$ ), 7.13(1H, s,  $\text{NCH}$ ), 7.02 (1H, s,  $\text{NCH}$ ), 9.69 (1H, s,  $\text{NCHN}$ ).

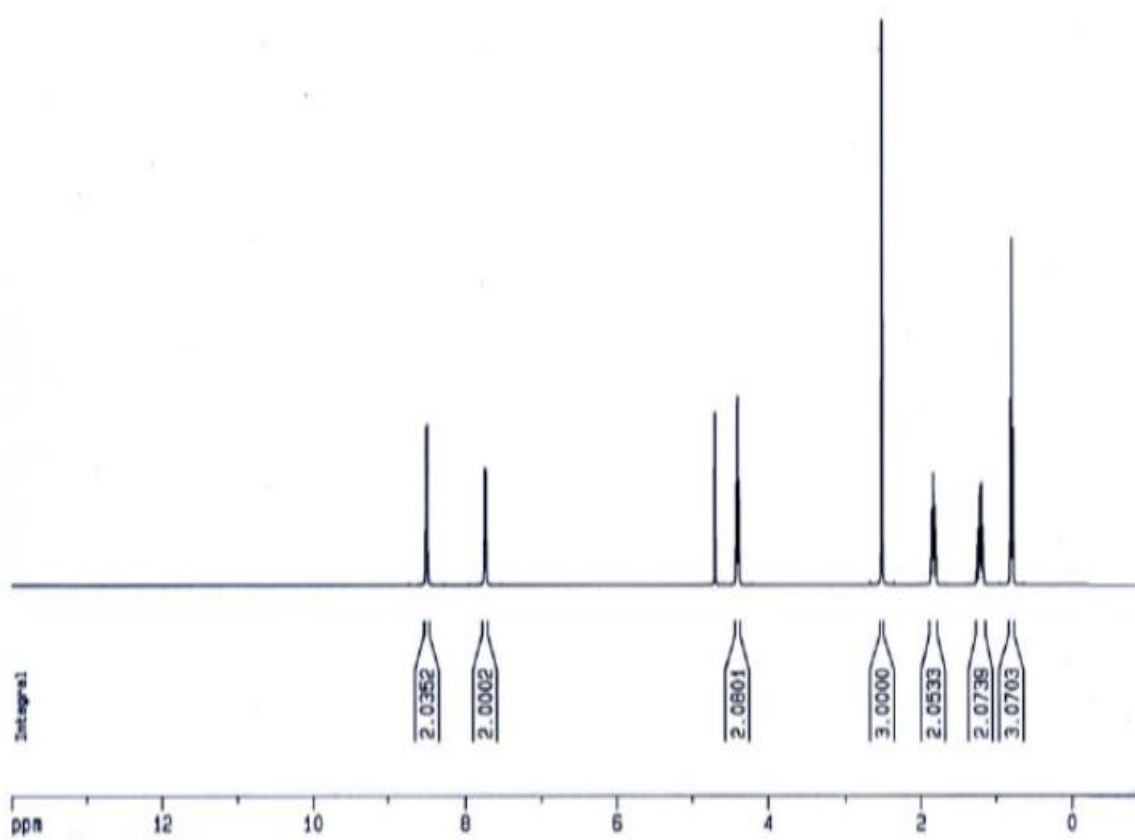

Figure S 4. <sup>1</sup>H NMR data of 1-butyl-4-methylpyridinium chloride: <sup>1</sup>H NMR (400MHz: D<sub>2</sub>O; δ/ppm relative to TMS): 0.79 (3H, but-CH<sub>3</sub>), 1.22 (2H, CH<sub>2</sub>), 1.82 (2H, CH<sub>2</sub>), 2.51 (3H, C-CH<sub>3</sub>), 4.40 (2H, N-CH<sub>2</sub>), 7.73 (2H, CH), 8.51 (2H, N-CH).

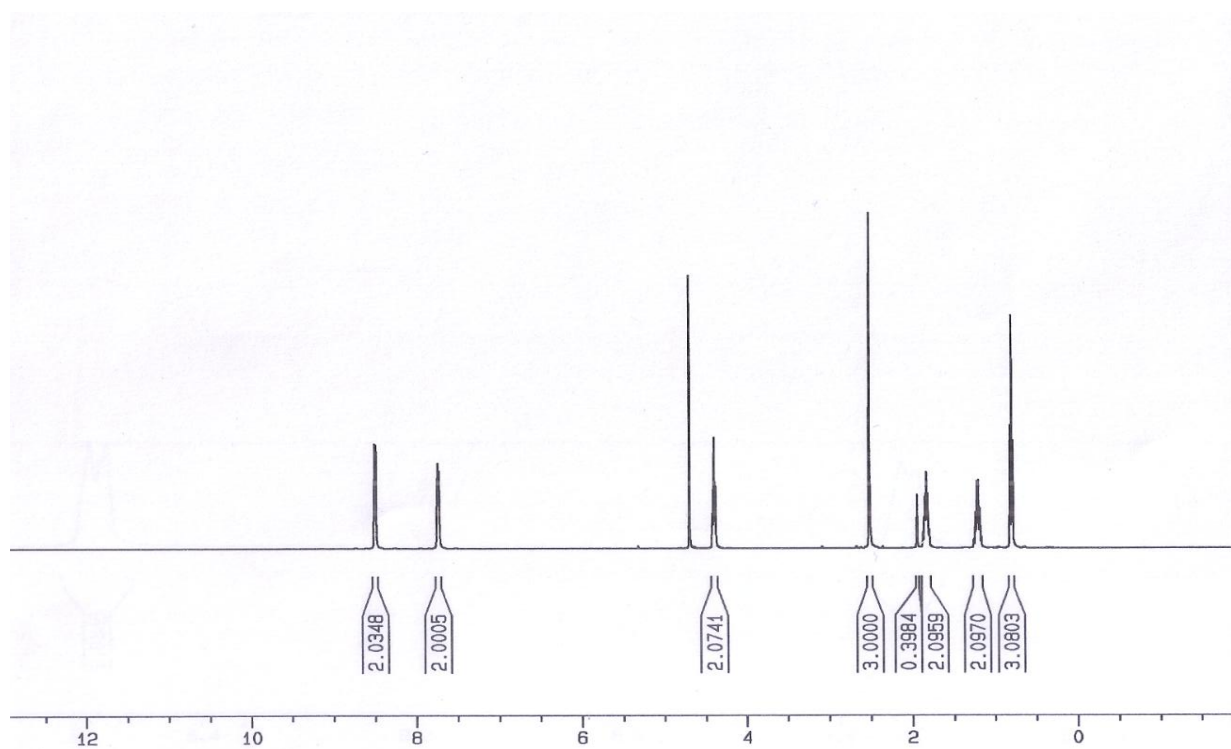

Figure S5.  $^1\text{H}$  NMR data of 1-butyl-4-methylpyridinium tetra fluoro borate:  $^1\text{HNMR}$  (400MHz:  $\text{D}_2\text{O}$ ;  $\delta$ / ppm relative to TMS): 0.80 (3H, but- $\text{CH}_3$ ), 1.216 (2H,  $\text{CH}_2$ ), 1.82 (2H,  $\text{CH}_2$ ), 2.51 (3H, C- $\text{CH}_3$ ), 4.70 (2H, N- $\text{CH}_2$ ), 7.73 (2H, CH), 8.49 (2H, N-CH).

Additionally, the spectrum shows a signal at 4.7 ppm ( $\text{D}_2\text{O}$ , HDO).

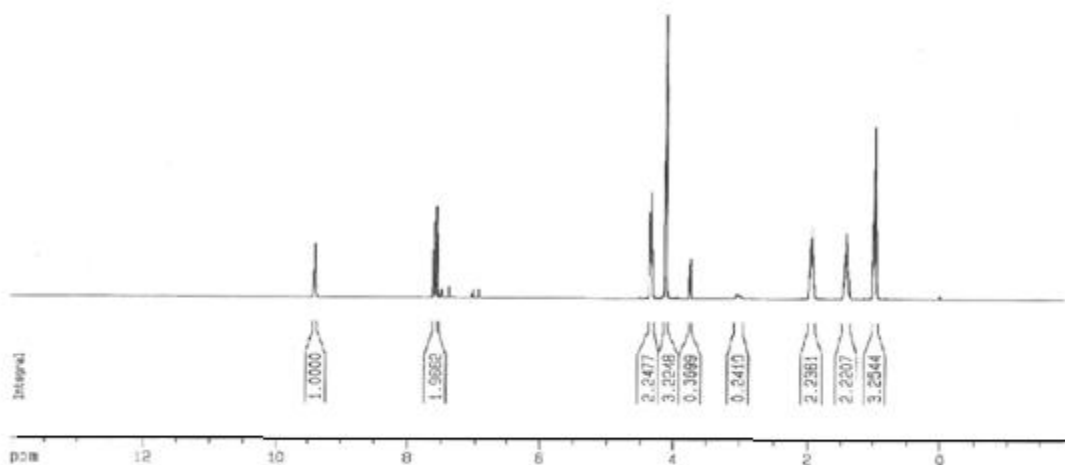

Figure S6. <sup>1</sup>H NMR data of 1-butyl-3-methyl imidazolium thiocyanate: <sup>1</sup>H NMR (400MHz: CDCl<sub>3</sub>; δ/ppm relative to TMS): 0.97 (3H, t, but-CH<sub>3</sub>), 1.42 (2H, m, CH<sub>2</sub>), 1.95 (2H, m, CH<sub>2</sub>), 3.73 (3H, s, NCH<sub>3</sub>), 4.31 (2H, t, NCH<sub>2</sub>), 7.01 (1H, s, NCH), 7.61 (1H, s, NCH), 9.38 (1H, s, NCHN).

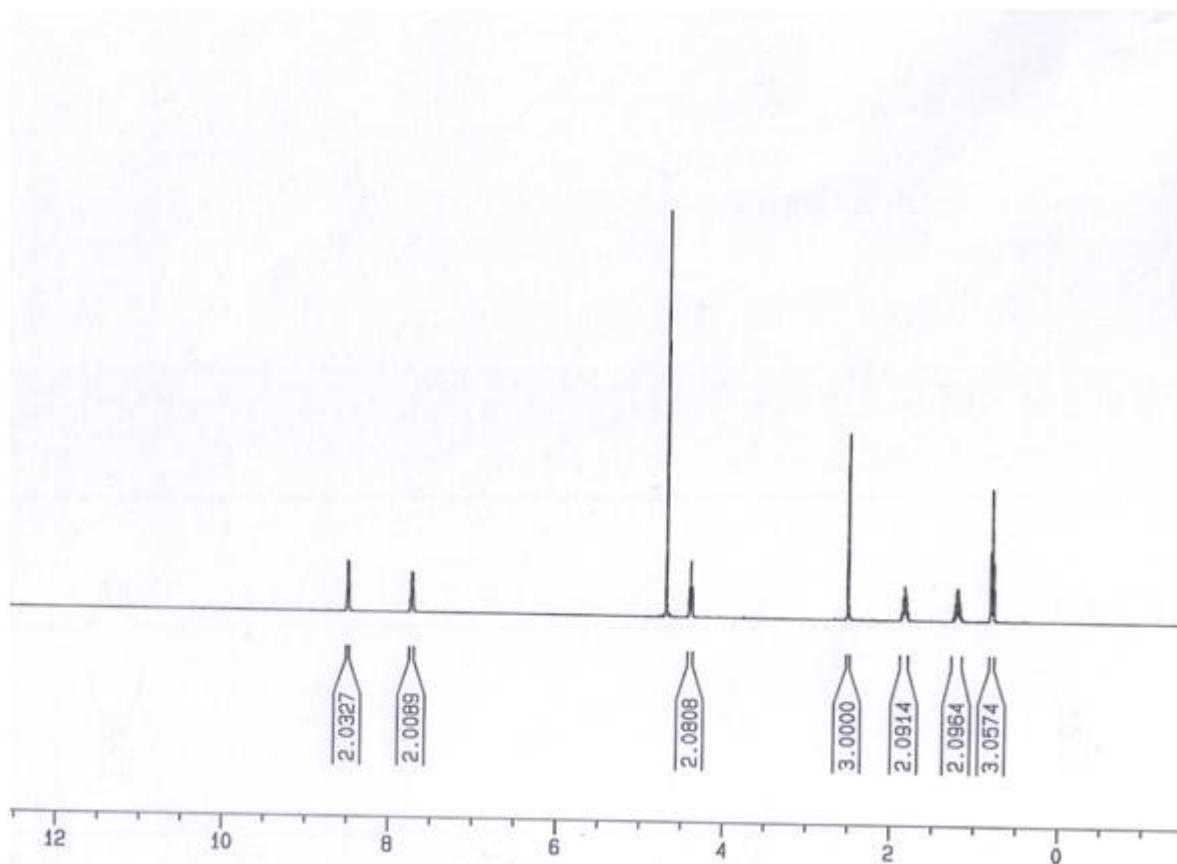

Figure S7. <sup>1</sup>H NMR data of 1-butyl-4-methylpyridinium thiocyanate: <sup>1</sup>H NMR (400MHz: D<sub>2</sub>O; δ/ ppm relative to TMS): 0.80 (3H, but-CH<sub>3</sub>), 1.219 (2H, CH<sub>2</sub>), 1.84 (2H, CH<sub>2</sub>), 2.51 (3H, C-CH<sub>3</sub>), 4.70 (2H, N-CH<sub>2</sub>), 7.73 (2H, CH), 8.51 (2H, N-CH).
